# Supplementary material for: Effect of opium consumption on cardiovascular diseases – a cross- sectional study based on data of Rafsanjan cohort study
Source: Springer Nature journal article supplement (doi:10.1186/s12872-020-01788-4), 2021-01-02
Supplement: MOESM1 [file 18717742]

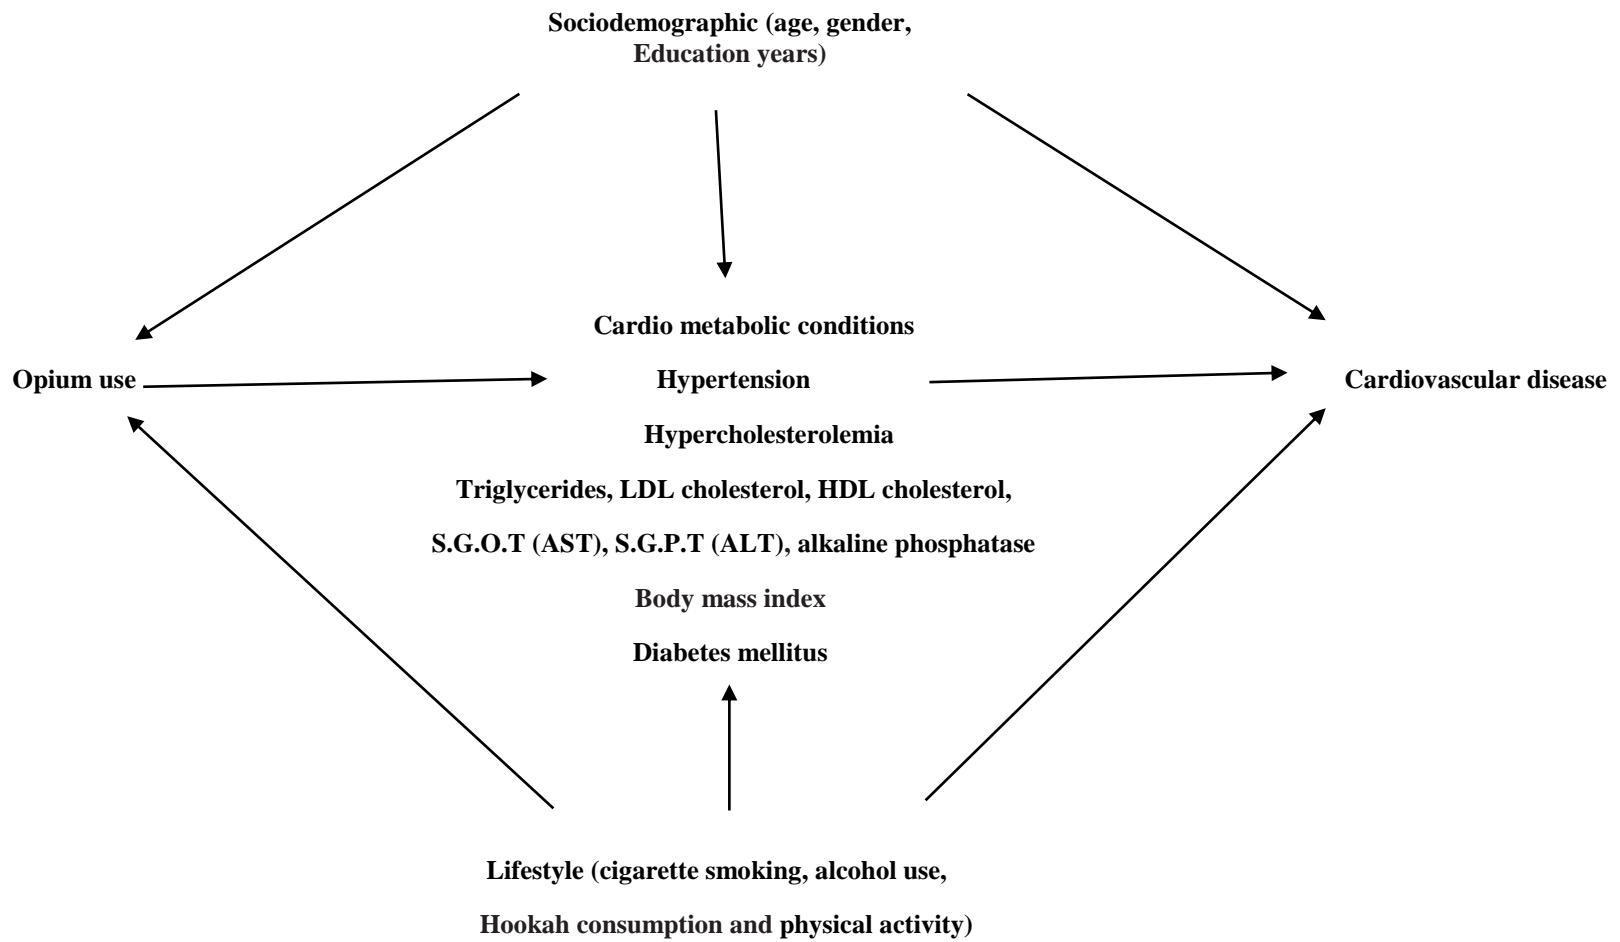

Figure 1. Causal diagram.
